# Supplementary material
Source: publisher figshare collection journal article supplement (https://acs.figshare.com/ndownloader/files/14486219)
Supplement: Supplementary file 1 [file 14486219]

## Supporting Information

### Highly Aligned Molybdenum Trioxide Nanobelts for Flexible Thin-Film

### Transistors and Supercapacitors: Macroscopic Assembly and Anisotropic

### Electrical Properties

Linpeng Li<sup>†</sup>, Hongwei Fan<sup>†</sup>, Chengyi Hou<sup>\*,†</sup>, Qinghong Zhang<sup>‡</sup>, Yaogang Li<sup>‡</sup>, Hao Yu<sup>\*,†</sup>, and Hongzhi Wang<sup>†</sup>

<sup>†</sup>State Key Laboratory for Modification of Chemical Fibers and Polymer Materials, College of Materials Science and Engineering, Donghua University, Shanghai 201620, China

<sup>‡</sup>Engineering Research Center of Advanced Glasses Manufacturing Technology, MOE, Donghua University, Shanghai 201620, China

\*Corresponding authors emails: [hcy@dhu.edu.cn](mailto:hcy@dhu.edu.cn) and [yh@dhu.edu.cn](mailto:yh@dhu.edu.cn)

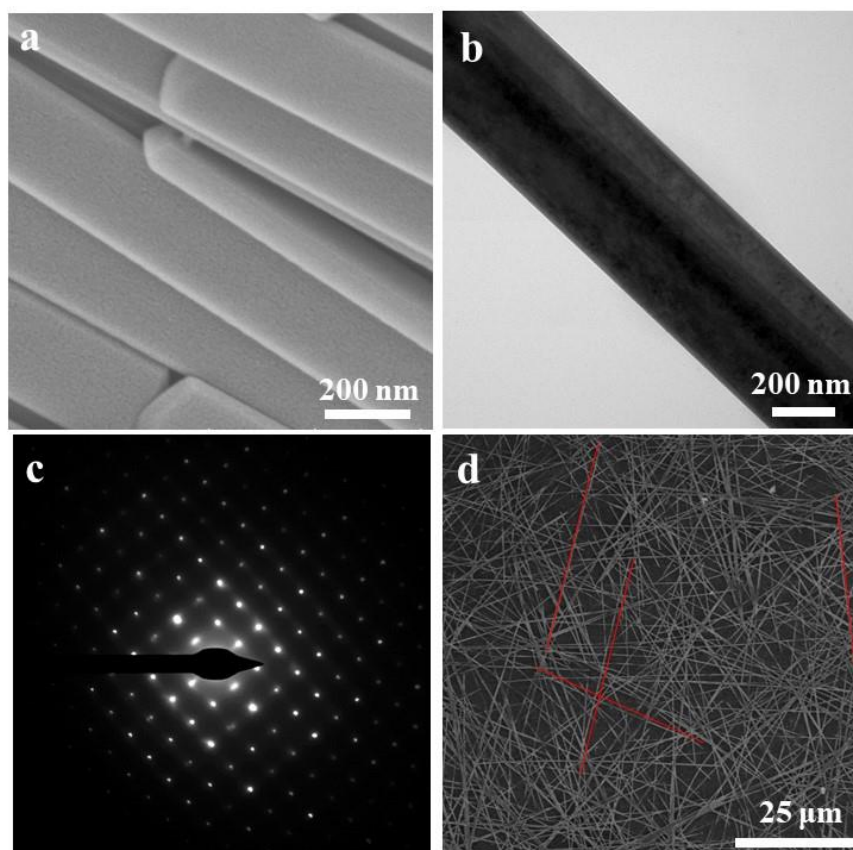

Figure S1. (a) High-magnification FESEM image of as-synthesized  $\text{MoO}_3$  nanobelts. (b) TEM images of the as-synthesized  $\text{MoO}_3$  nanobelts. (c) Selected-area electron diffraction (SAED) pattern of individual  $\text{MoO}_3$  nanobelts. (d) Low-magnification FESEM image of  $\text{MoO}_3$  nanobelts. Red lines indicate the length of individual nanobelt.

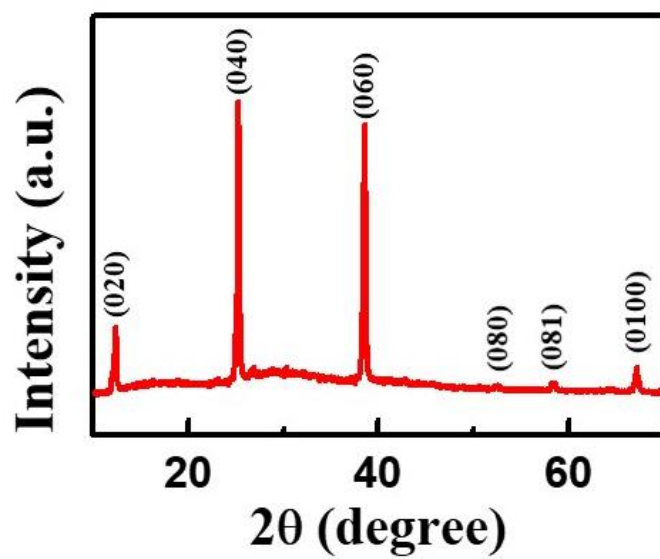

Figure S2. XRD pattern of MoO<sub>3</sub> nanobelts.

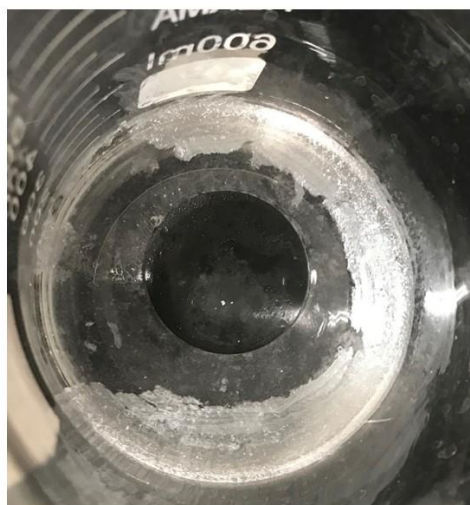

Figure S3. Digital photograph of nanobelts after self-assemble process.

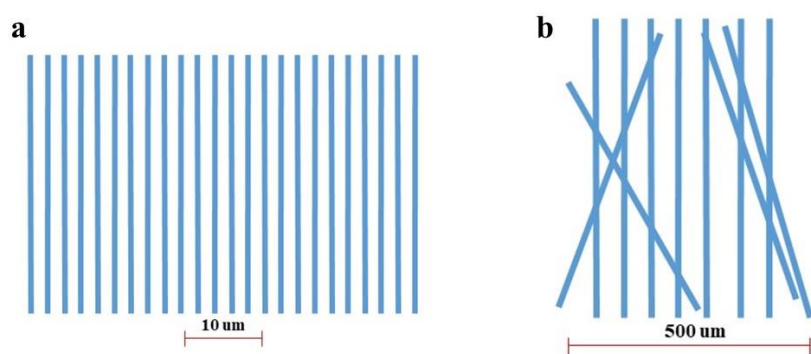

Figure S4. Schematic diagram of the calculation of nanobelts compactness (a) and alignment ratio (b).

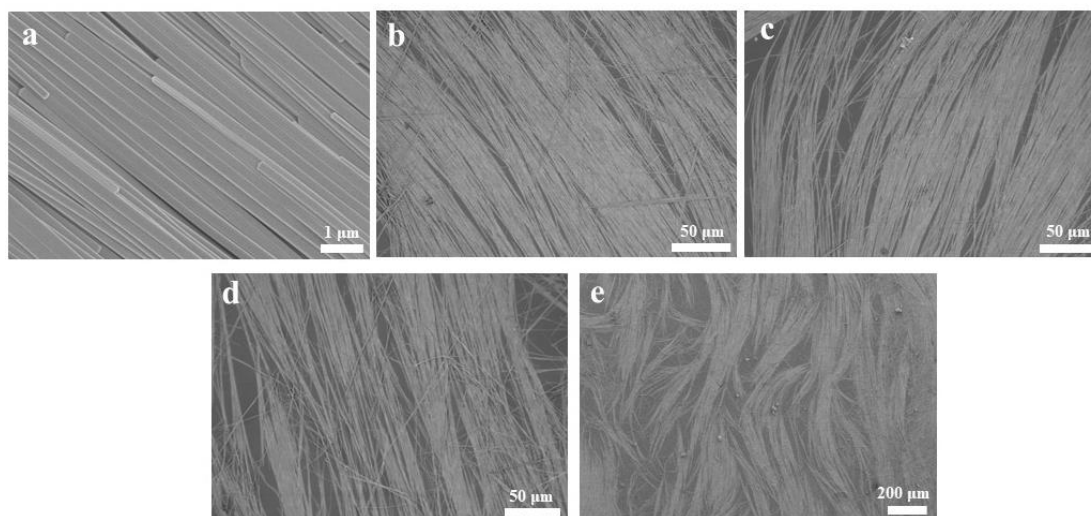

Figure S5. FESEM images showing the assembly conditions in different areas. (a) Central ring area. 0.4 cm (b) 0.8 cm (c) 1.2 cm (d) 1.6 cm (e) from the central area.

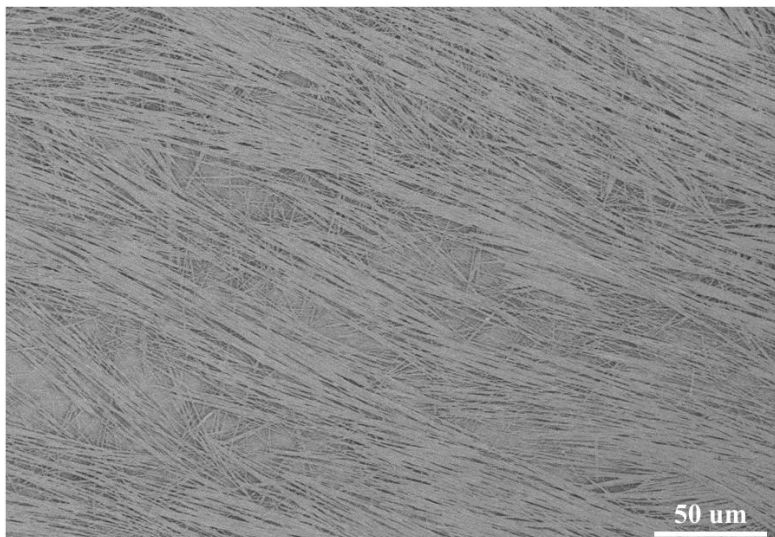

Figure S6. FESEM image of assembled MoO<sub>3</sub> nanobelts using CHCl<sub>3</sub> as underlying solvent. The experimental condition is similar to that using CH<sub>2</sub>Cl<sub>2</sub> as underlying solvent except the solvent type. (2 mg/mL MoO<sub>3</sub> nanobelts dispersion, 20 mL solvent in a 60 mL baker)

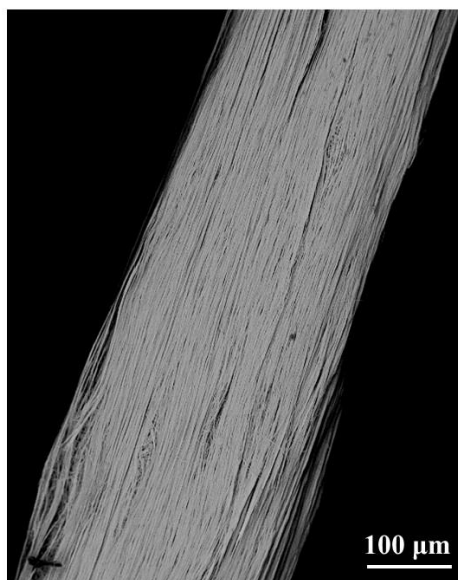

Figure S7. FESEM image of aligned MoO<sub>3</sub> nanobelts yarn.

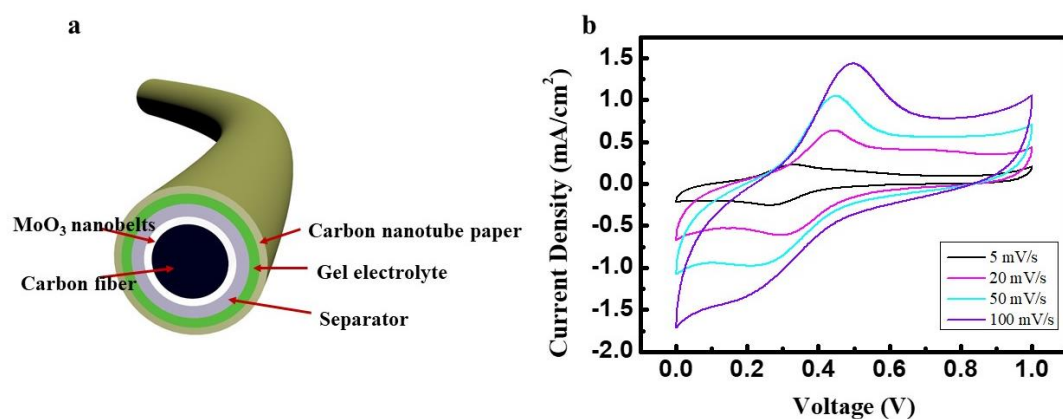

Figure S8. (a) Schematic diagram of the fiber-shaped supercapacitor. (b) Cyclic voltammetry (CV) curves of fiber-shaped supercapacitor at scan rates from 5 to 100 mV/s.

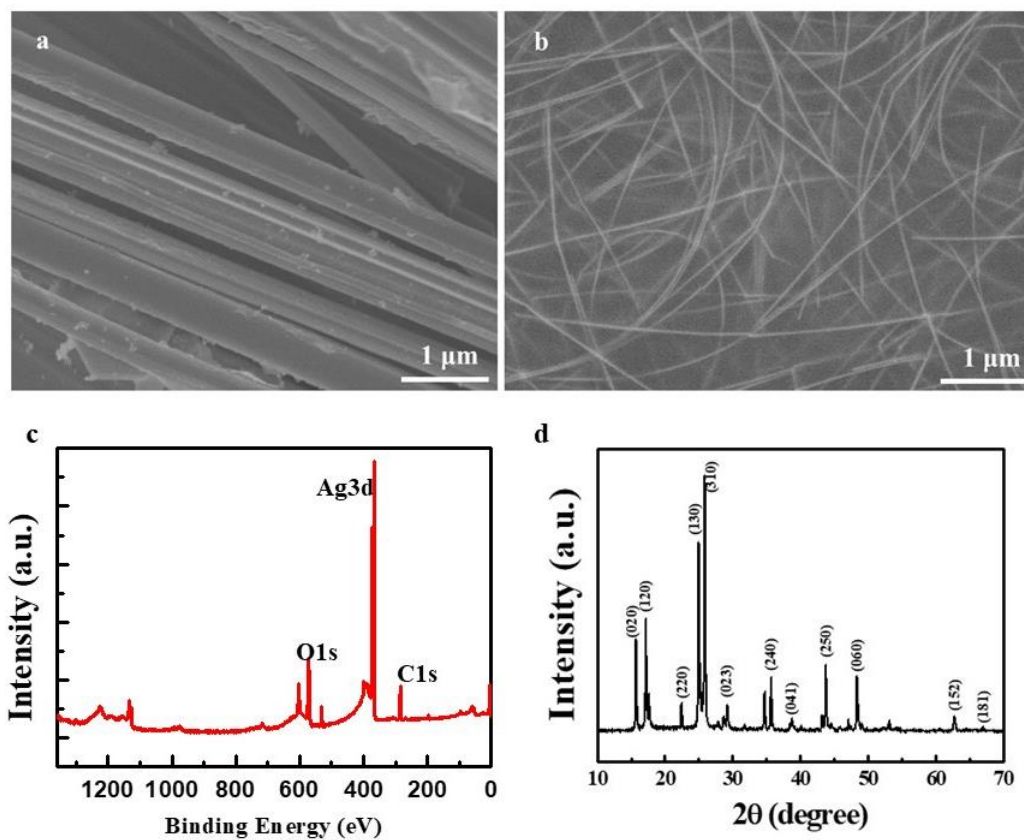

Figure S9. FESEM images of wire-like particles of bismuth sulfide nanobelts (a) and

silver nanowires (b) after drying. (c) X-ray photoelectron spectroscopy (XPS) of silver nanowires. (d) XRD pattern of Bi<sub>2</sub>S<sub>3</sub> nanobelts.

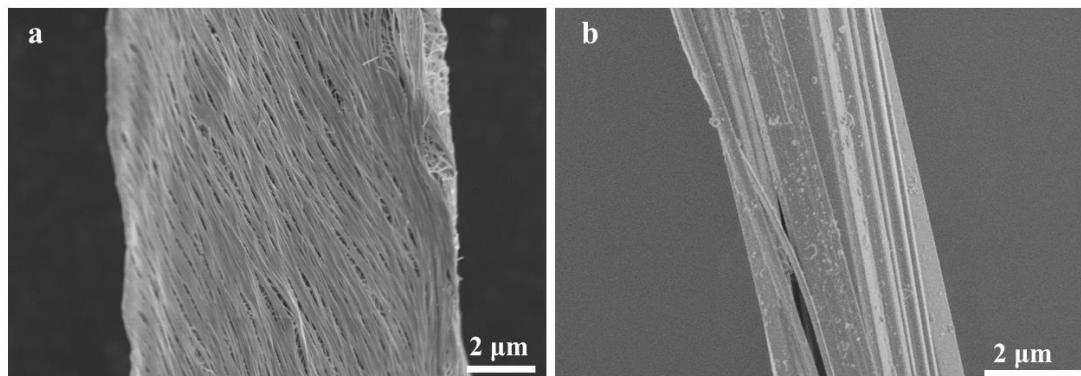

Figure S10. FESEM images of silver nanowires yarn (a) and bismuth sulfide nanobelts yarn (b).

Note S1:

$$\text{Compactness} = \frac{n}{l}$$

where n is the number of nanobelts, l is the counting distance.

$$\text{Alignment ratio} = \frac{N}{L}$$

where N is the number of nanobelts parallel to alignment direction, L is the total number of nanobelts in 500 μm.

Note S2:

The surface tension is calculated by the formula



$$\gamma = \frac{\rho g h r}{2 \cos \theta}$$

where  $\gamma$  is the surface tension,  $\rho$  is the density,  $g$  is the gravity constant,  $h$  is the height in capillary tube,  $r$  is the diameter of capillary, and  $\theta$  is 46.5 for capillary tube. Through measurement,  $h_{\text{water}}$  and  $h_{\text{CH}_2\text{Cl}_2}$  are 1.55 cm and 2.85 cm. After calculation, surface tensions of water and  $\text{CH}_2\text{Cl}_2$  phase are 25.16 mN/m, and 50.72 mN/m. According to Antonoff law, surface tension in water- $\text{CH}_2\text{Cl}_2$  interface is 25.56 mN/m.

Through experimental observation,  $\text{MoO}_3$  nanobelts in water phase is well-dispersed for a few days, in which the forces acting on the nanobelt are in equilibrium. Therefore, the gravity is greater than the electrostatic interaction because of the buoyancy effect ( $F_{\text{gravity}} > F_{\text{electrostatic}}$ ).

According to the formula,

$$F_{\text{gravity}} = \rho v g$$

where  $\rho$  is the density,  $v$  is the volume, and  $g$  is the gravity constant. For molybdenum trioxide nanobelts,  $\rho = 4.692 \text{ g/cm}^3$ ,  $v = 50 \text{ um} \times 0.3 \text{ um} \times 0.05 \text{ um} = 0.75 \text{ um}^3$ .  $g = 9.8 \text{ mN/g}$ .  $F_{\text{gravity}} = 3.45 \times 10^{-11} \text{ mN}$ . Therefore,  $F_{\text{electrostatic}} < 3.45 \times 10^{-11} \text{ mN}$ .

The self-assembled ordered structure was realized in air-water- $\text{CH}_2\text{Cl}_2$  phase, in which interfacial force is the main driving factor of self-assembled ordered structure. The surface tension is calculated by formula,

$$\gamma = \frac{\rho g h r}{2 \cos \theta}$$

where  $\gamma$  is the surface tension,  $\rho$  is the density,  $g$  is the gravity constant,  $h$  is the height in capillary tube,  $r$  is the diameter of capillary, and  $\theta$  is 46.5 for capillary tube. Through measurement,  $h_{\text{water}}$  and  $h_{\text{CH}_2\text{Cl}_2}$  are 1.55 cm and 2.85 cm. After calculation, surface



tensions of water and CH<sub>2</sub>Cl<sub>2</sub> phase are 25.16 mN/m, and 50.72 mN/m. According to Antonoff law (*J. Phys. Chem.*, **1948**, 52, 969-975), surface tension in water-CH<sub>2</sub>Cl<sub>2</sub> interface is 25.56 mN/m. Therefore, capillary force of MoO<sub>3</sub> nanobelt ( $F_{\text{capillary}} = 25.56 \text{ mN/m} \times 50 \text{ } \mu\text{m} = 1.28 \times 10^{-3} \text{ mN}$ ).

From the concrete numerical value of capillary force ( $= 1.28 \times 10^{-3} \text{ mN}$ ) and electrostatic interaction ( $< 3.45 \times 10^{-11} \text{ mN}$ ), capillary force is the main driving force for the MoO<sub>3</sub> nanobelts assembly.
